# Supplementary material for: Surface plasmon resonance aptasensor for soluble ICAM-1 protein in blood samples
Source: Royal Society of Chemistry journal article supplement (doi:10.1039/d1an02332b), 2022-01-01
Supplement: d1an02332b1.pdf [file d1an02332b1.pdf]

## Surface Plasmon Resonance Aptasensor for Soluble ICAM-1 Protein in Blood Samples

Ali D. Dursun,<sup>\*a, b</sup> Soner Dogan,<sup>c</sup> Murat Kavruk,<sup>d</sup> B. Busra Tasbasi,<sup>e</sup> Mert Sudagidan,<sup>e</sup> M. Deniz Yilmaz,<sup>e, f</sup> Bayram Yilmaz,<sup>g</sup> Veli C. Ozalp,<sup>h</sup> and Bilge G. Tuna<sup>i</sup>

<sup>a</sup> Department of Physiology, School of Medicine, Atilim University, Ankara, Turkey.

<sup>b</sup> Vocational School of Health Services, Atilim University, Ankara, Turkey.

<sup>c</sup> Department of Medical Biology, School of Medicine, Yeditepe University, Istanbul, Turkey

<sup>d</sup> Department of Nutrition and Dietetics, School of Health Sciences, Atilim University, Ankara, Turkey.

<sup>e</sup> KIT-ARGEM R&D Center, Konya Food and Agriculture University, Konya, Turkey.

<sup>f</sup> Department of Bioengineering, Konya Food and Agriculture University, Konya, Turkey.

<sup>g</sup> Department of Physiology, School of Medicine, Yeditepe University, Istanbul, Turkey

<sup>h</sup> Department of Biology, School of Medicine, Atilim University, Ankara, Turkey.

<sup>i</sup> Department of Biophysics, School of Medicine, Yeditepe University, Istanbul, Turkey

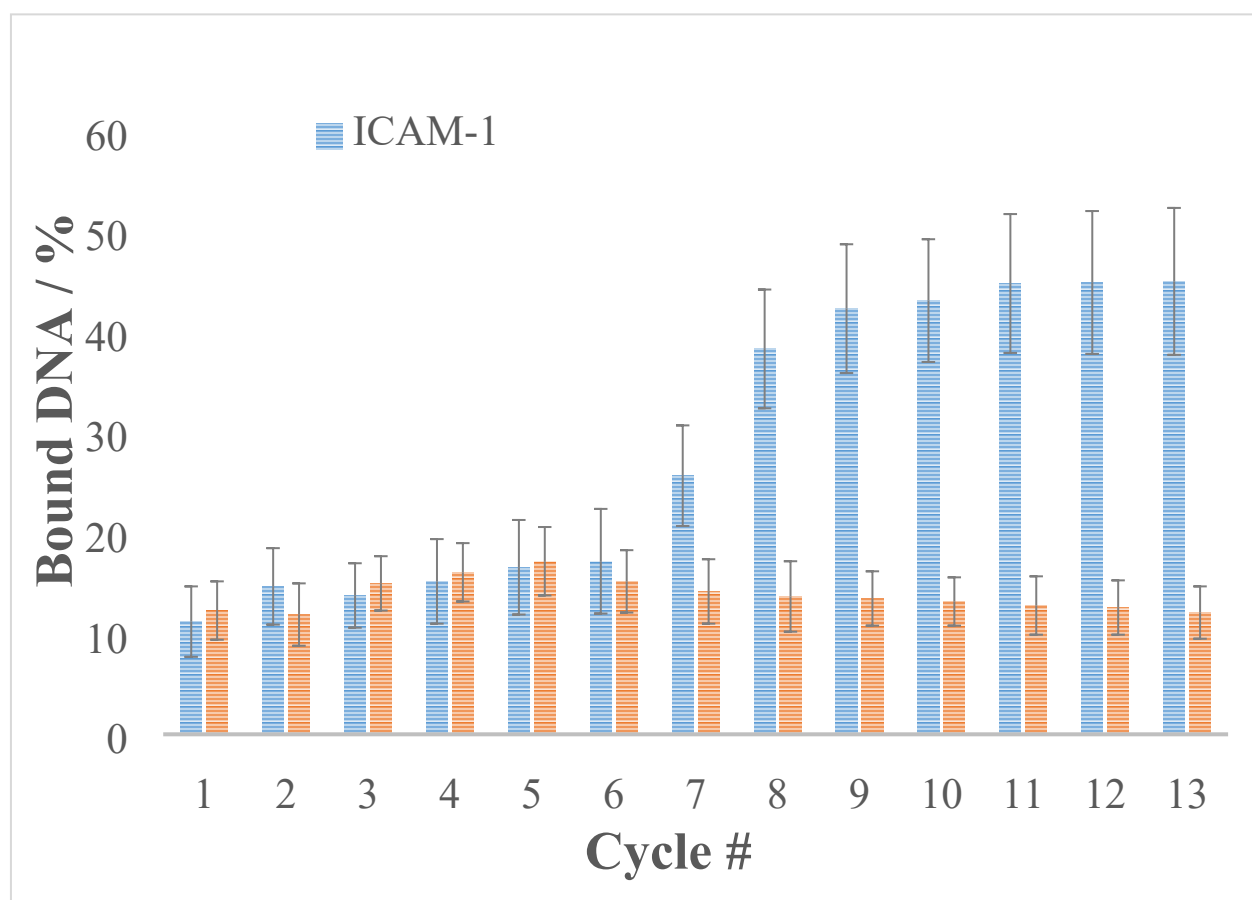

**Fig. S1.** The amount of bound library members by fluorescent enrichment analysis after each SELEX cycle.

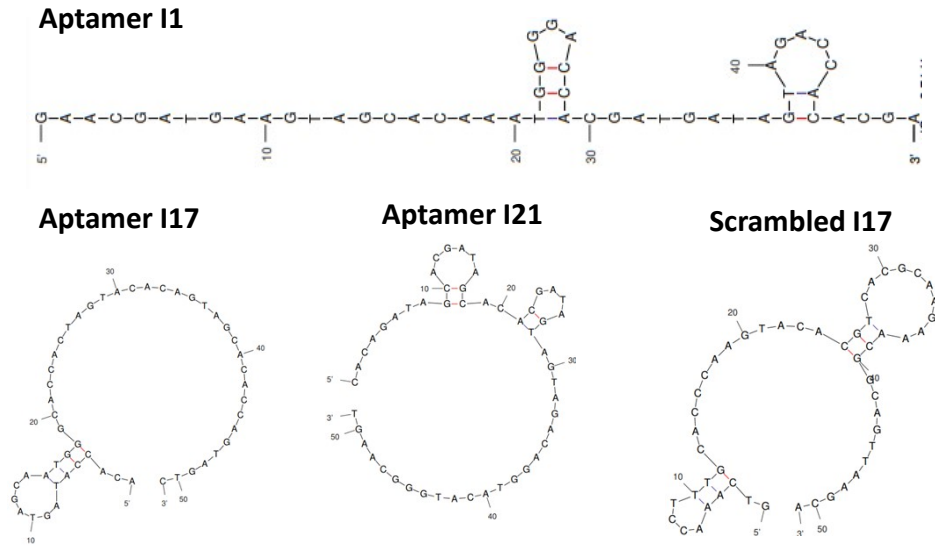

**Fig. S2.** The folding structures of aptamer sequences at 25 °C in PBS were obtained on Mfold web site.

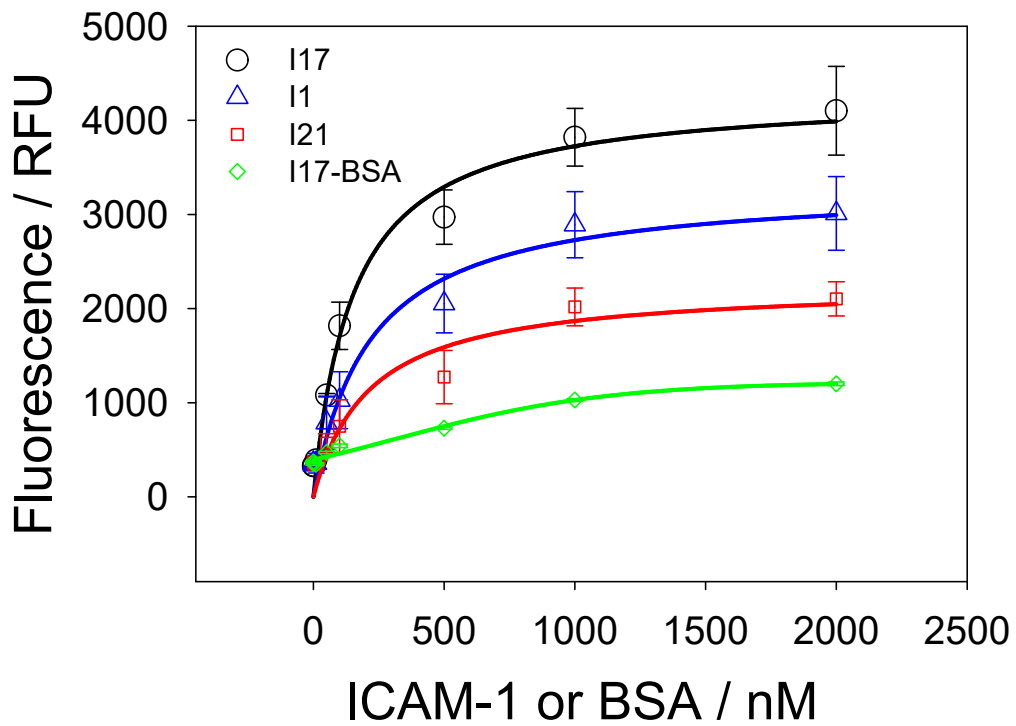

**Fig. S3.** Dose-response curve for selected aptamers and ICAM-1 as determined by fluorescence assay. I17 aptamer and BSA interaction is given in green line.

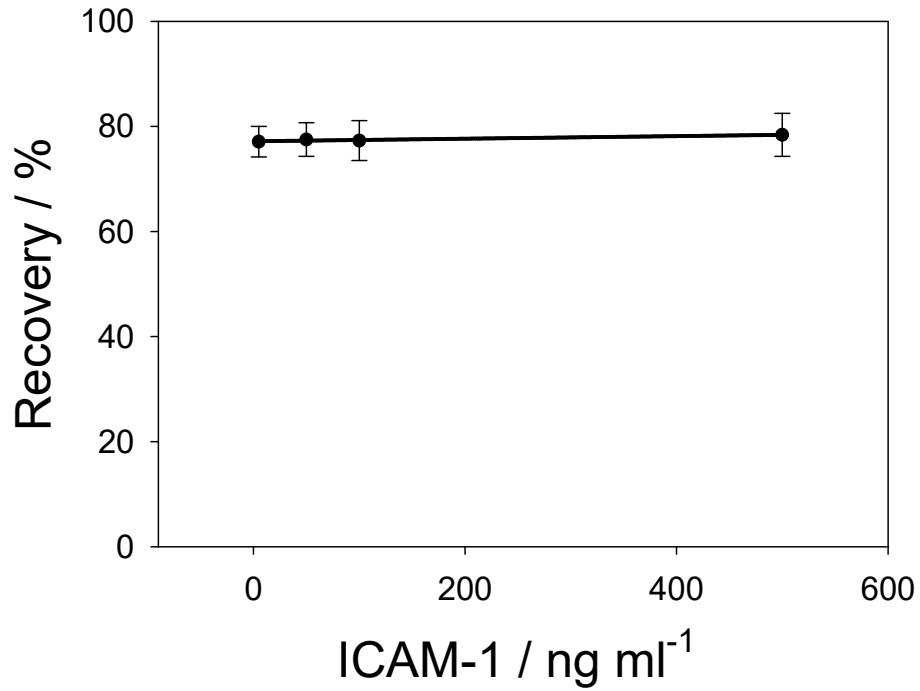

**Fig. S4.** Recovery analysis for magnetic separation procedure from blood samples spiked with ICAM-1 in 30 min treatments with  $100 \mu\text{g ml}^{-1}$  magnetic nanoparticles.

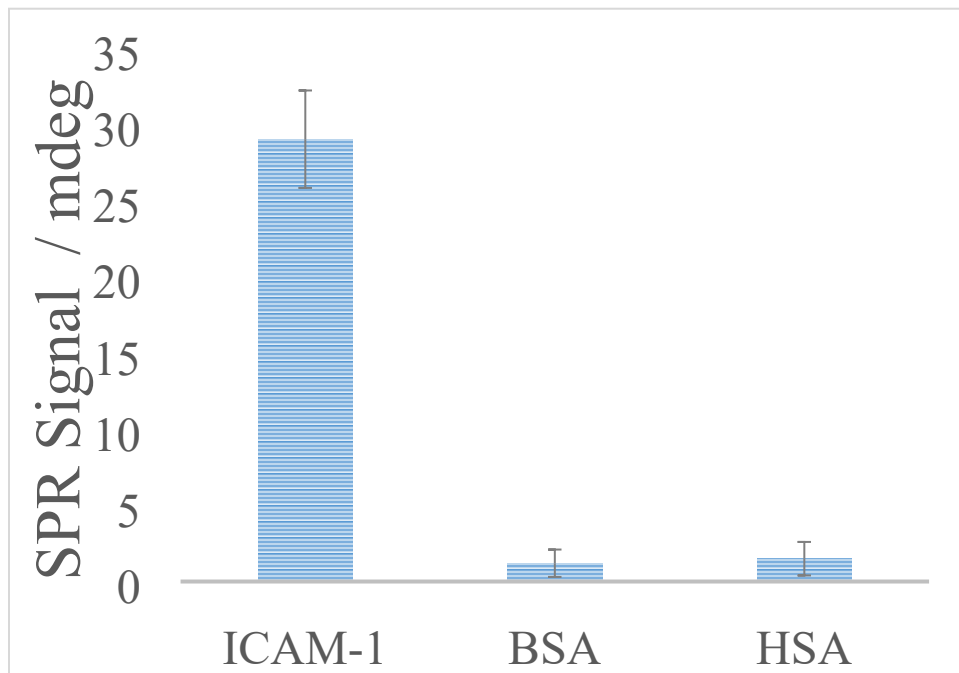

**Fig. S5.** The SPR signals at 600 seconds after Injection of ICAM-1, BSA or HAS spiked samples eluted from magnetic capture procedure of serum samples resulted in typical binding curves.

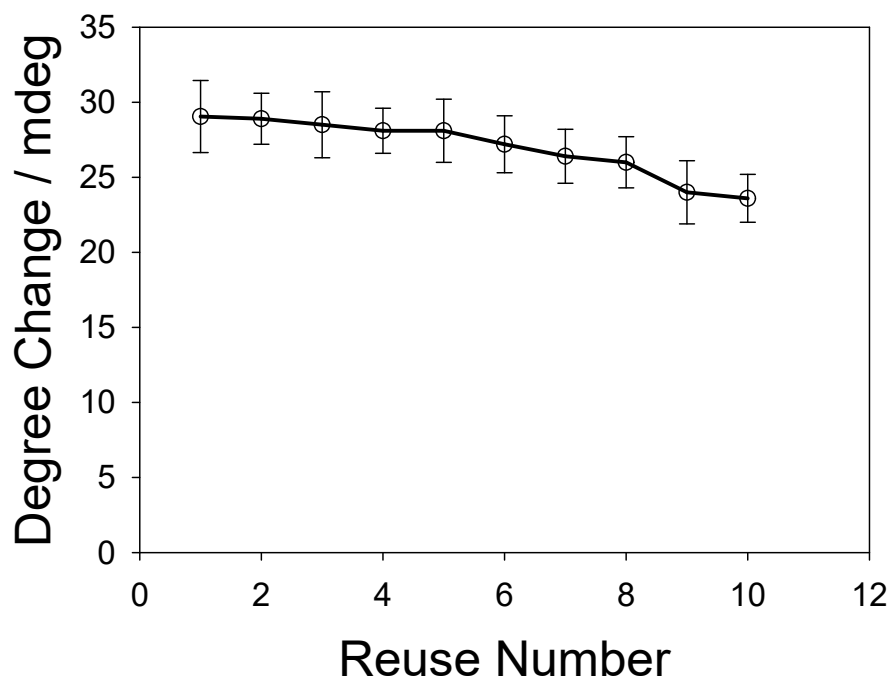

**Fig. S6.** SPR signal after repeated injection cycles of 100 ng ml<sup>-1</sup> ICAM-1 sample and subsequent regeneration procedure.

**Table S1.** Recovery analysis for magnetic separation procedure from blood samples spiked with ICAM-1 in 30 min treatments with 100 µg ml<sup>-1</sup> magnetic nanoparticles with SPR or ELISA method.

| ICAM-1 (ng ml <sup>-1</sup> ) | SPR (% recovery) | ELISA (% recovery) |
|-------------------------------|------------------|--------------------|
| 5                             | 77.1 ± 1.7       | 78.5 ± 6.9         |
| 50                            | 77.5 ± 2.4       | 78.6 ± 5.3         |
| 100                           | 77.3 ± 2.3       | 78.0 ± 3.6         |
| 500                           | 78.4 ± 2.4       | 78.7 ± 5.9         |
